# Supplementary material for: A model of hepatic steatosis with declined viability and function in a liver-organ-on-a-chip
Source: PubMed Central journal article supplement (PMC10562420; doi:10.1038/s41598-023-44198-0), 2023-10-09

# Supplementary Figure 1.

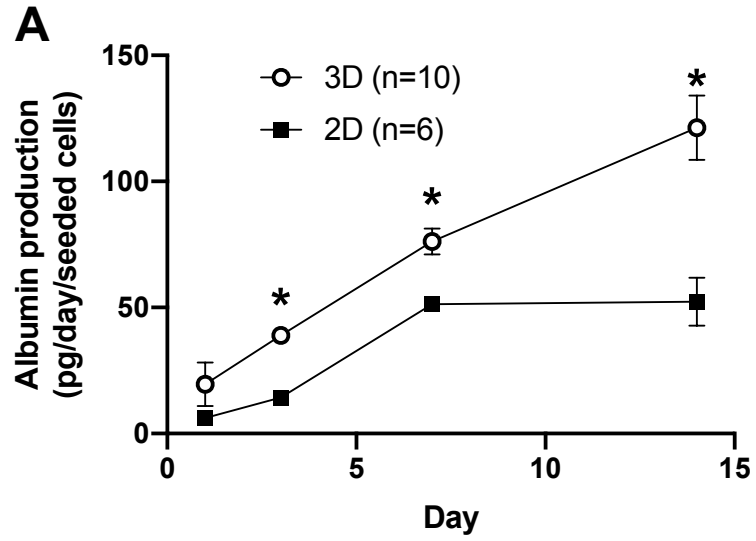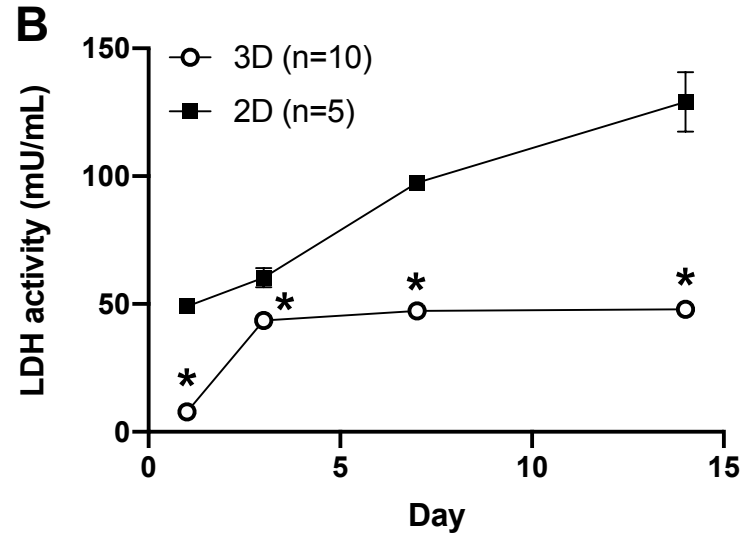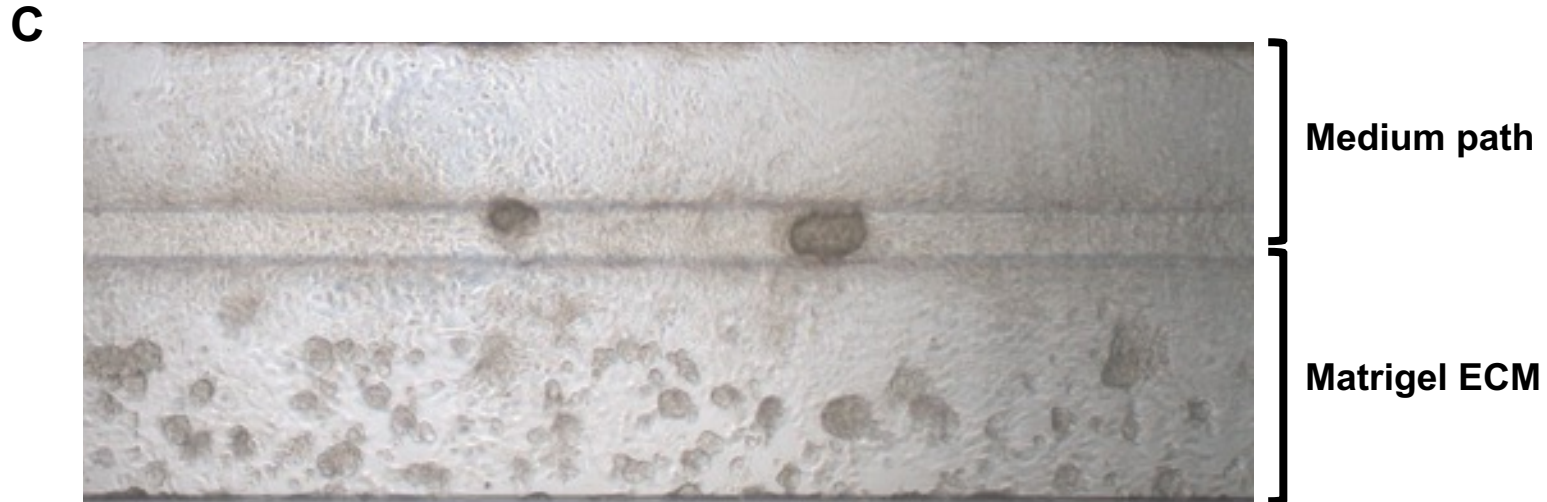

## Supplementary Figure 2.

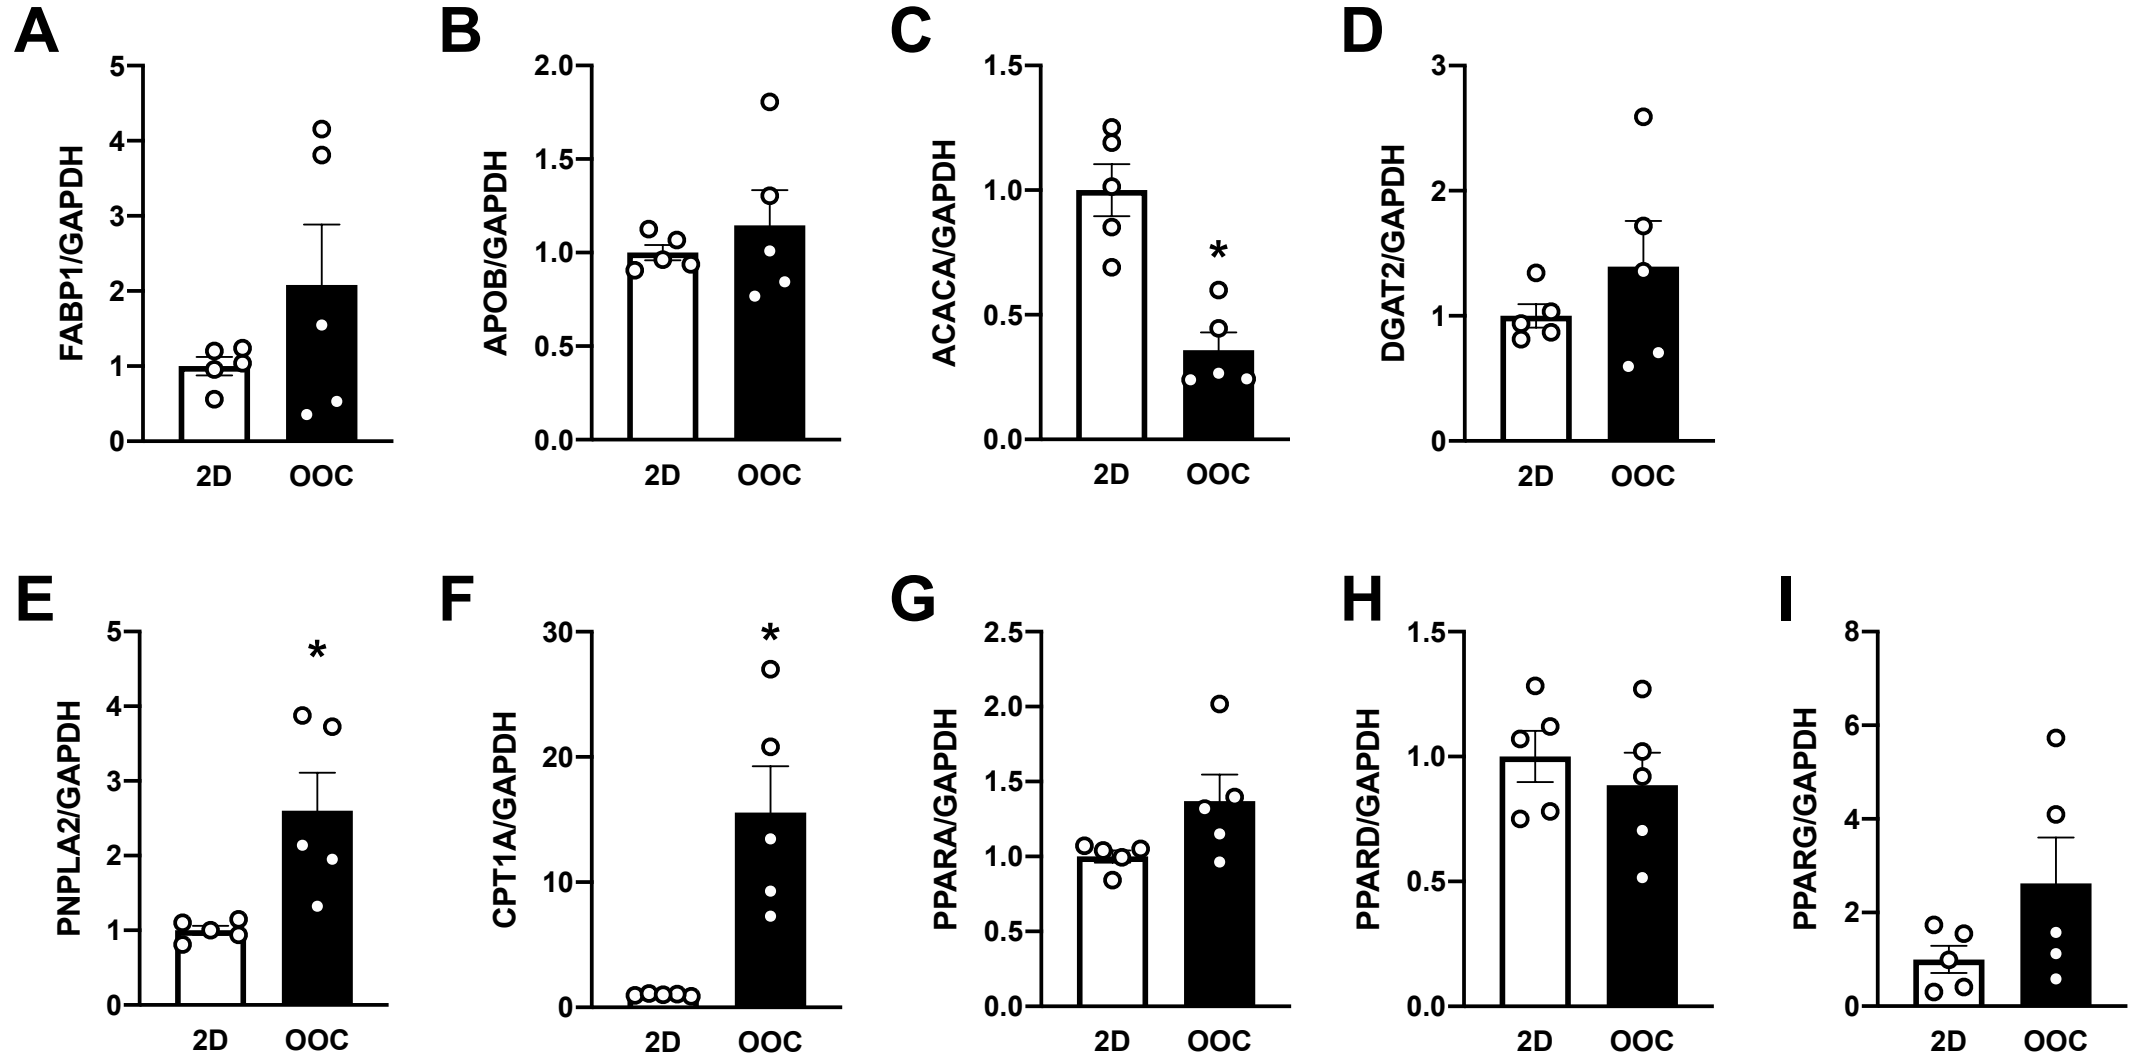

Supplementary Figure 3.

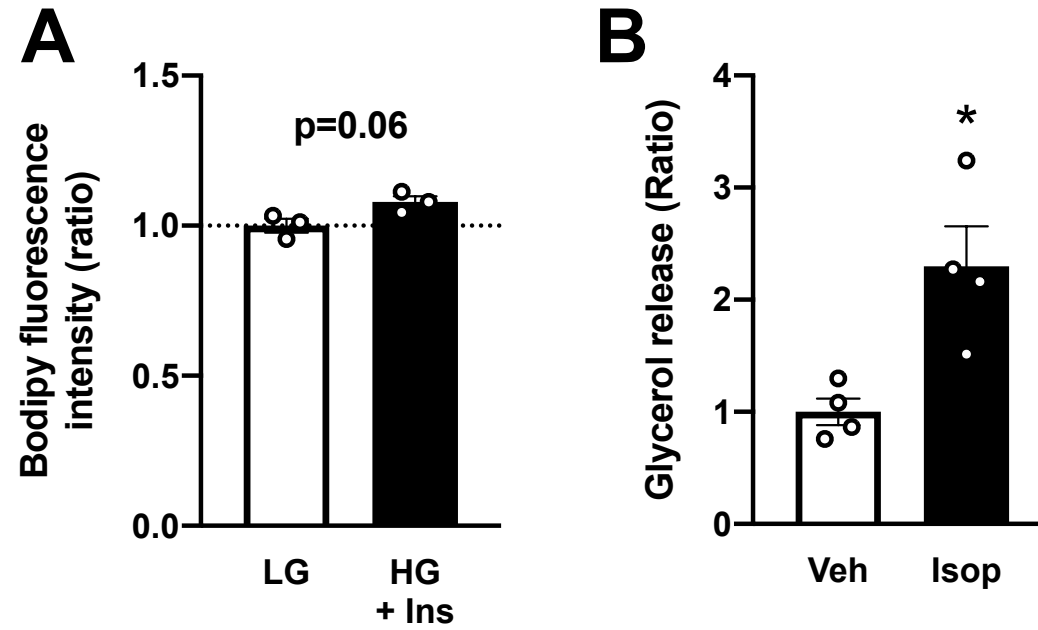

Supplementary Figure 4.

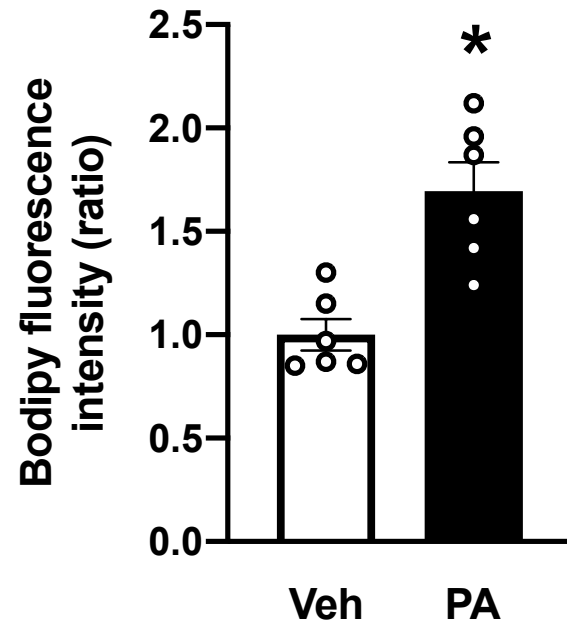

Supplement: 41598_2023_44198_MOESM3_ESM.pdf [file 41598_2023_44198_MOESM3_ESM.pdf]
